# Supplementary material for: Biochemical Characterization of Human Retroviral-Like Aspartic Protease 1 (ASPRV1)
Source: MDPI journal article supplement (doi:10.3390/biom10071004), 2020-07-06
Supplement: s1 [file s1]

**Figure S1. Secondary structure prediction of SASP14 by different methods.** Secondary structural organization of wild-type SASP14 was predicted by different methods, secondary structural elements are shown by different color: yellow,  $\beta$ -strand; red,  $\alpha$ -helix; active site motif residues, black and bold. The additional helical insert was predicted by PredictProtein, JPred4 and SOPMA prediction algorithms, while the consensus helix and three C-terminal  $\beta$ -sheets were predicted by all methods.

|                |                                                                                                                                   |
|----------------|-----------------------------------------------------------------------------------------------------------------------------------|
|                | ..... ..... ..... ..... ..... ..... ..... ..... ..... ..... ..... ..... ..... ..... ..... .....                                   |
| PredictProtein | SMGKG <u>GYLKGKI</u> GK <u>VPVRFLV</u> DSGAQVSVVH <u>PNLWEEV</u> TDGDLDLTLQPFEN <u>VVK</u> VANGAEM <u>KILGVWD</u>                 |
| JPred4         | SMGKG <u>GYLKGKI</u> GK <u>VPVRFLV</u> DSGAQVS <u>VVH</u> <u>PNLWEEV</u> TDGDLDLTLQPFEN <u>NVVKV</u> ANGAE <u>MKILGVWD</u>        |
| DSC            | SMGKG <u>GYLKG</u> KIGK <u>VPVRFLV</u> DSGAQVSVVH <u>PNLWEEV</u> TDGDLDLTLQPFEN <u>NVVKV</u> ANGAE <u>EMKILGVWD</u>               |
| SOPMA          | SMGKG <u>GYL</u> KGKIGKVP <u>VRFLV</u> DSGAQVS <u>VH</u> <u>PNLWEEV</u> TDGDLD <u>TL</u> QPFEN <u>NVVKV</u> ANGAE <u>MKILGVWD</u> |
| GOR4           | SMGKG <u>GYLKG</u> KIGK <u>VPVRFLV</u> DSGAQVS <u>VH</u> PNLW <u>EEV</u> TDGDLDLTLQPF <u>FENVVKV</u> ANGA <u>EMKILGVWD</u>        |
|                | ..... ..... ..... ..... ..... ..... ..... ..... ..... ..... ..... ..... ..... ..... ..... .....                                   |
| PredictProtein | <u>TAVSL</u> GKLK <u>LKAQFLVANASAEAAII</u> G <u>TDVLQD</u> HNA <u>ILD</u> FEHR <u>TCTL</u> KGKK <u>FRL</u> LPVGGSLDEFDLE          |
| JPred4         | <u>TAVSL</u> GKL <u>LKLKAQFLVANASAEAAII</u> G <u>TDVLQD</u> HNA <u>ILD</u> FEHR <u>TCTL</u> KGKK <u>FRL</u> LPVGGSLDE <u>FDLE</u> |
| DSC            | <u>TAVSL</u> GKL <u>LKLKAQFLVANASAEAAII</u> G <u>TDVLQD</u> HNA <u>ILD</u> FEHR <u>TCTL</u> KGKK <u>FRL</u> LPVGGSLDEFDLE         |
| SOPMA          | <u>TAVSL</u> GKL <u>LKLKAQFLVANASAEAAII</u> G <u>TDVLQD</u> HNA <u>ILD</u> FEHR <u>TCTL</u> KGKK <u>FRL</u> LPVGGSLDE <u>FDLE</u> |
| GOR4           | <u>TAVSL</u> GKLK <u>LKAQFLVANASAEAAII</u> G <u>TDVLQD</u> HNA <u>ILD</u> FEHR <u>TCTL</u> KGKK <u>FRL</u> LPVGGSLDE <u>FDLE</u>  |
