# Supplementary material for: Biochemical Characterization of Human Retroviral-Like Aspartic Protease 1 (ASPRV1)
Source: MDPI journal article supplement (doi:10.3390/biom10071004), 2020-07-06
Supplement: s1 [file s1]

**Table S2.** Compositions of S2 and S3 substrate-binding cavities of HIV-1 and SASP14 proteases. Binding site-forming residues of HIV-1 and SASP14 proteases are shown. Bold letters indicate residues where side chain-side chain interaction may occur. Residues were classified as follows. Hydrophobic: A, V, I, L, F, W, C, M, P, G; hydrophilic: S, T, N, Q, Y, H; and charged: D, E, K, R. \* Binding site-forming residues of HIV-1 PR have been identified previously [24, 25].

| S2 site    |            |                 | S3 site    |            |
|------------|------------|-----------------|------------|------------|
| HIV-1*     | SASP14     |                 | HIV-1*     | SASP14     |
| <b>A28</b> | <b>A25</b> |                 | <b>L10</b> | <b>Y7</b>  |
| <b>D30</b> | <b>V27</b> |                 | <b>R8</b>  | <b>G5</b>  |
| <b>V32</b> | <b>V29</b> |                 | <b>D29</b> | <b>Q26</b> |
| <b>I47</b> | <b>V53</b> |                 | <b>G48</b> | <b>K54</b> |
| G48        | K54        |                 | <b>V82</b> | <b>E90</b> |
| G49        | V55        |                 |            |            |
| <b>I50</b> | <b>A56</b> |                 |            |            |
| <b>L76</b> | <b>L83</b> |                 |            |            |
| <b>I84</b> | <b>I93</b> |                 |            |            |
| 86         | 100        | hydrophobic (%) | 60         | 20         |
| 0          | 0          | hydrophylic (%) | 0          | 40         |
| 14         | 0          | charged (%)     | 40         | 40         |
