# Supplementary material for: Biochemical Characterization of Human Retroviral-Like Aspartic Protease 1 (ASPRV1)
Source: MDPI journal article supplement (doi:10.3390/biom10071004), 2020-07-06

**Figure S3.** Model evaluation by ProSA web server. Homology model of SASP14 and Ddi1 template structures were analyzed by ProSA web server. z-score indicates overall model quality, while local model quality is shown by plotting energies as a function of amino acid sequence position (positive values correspond to problematic parts of the input structure).

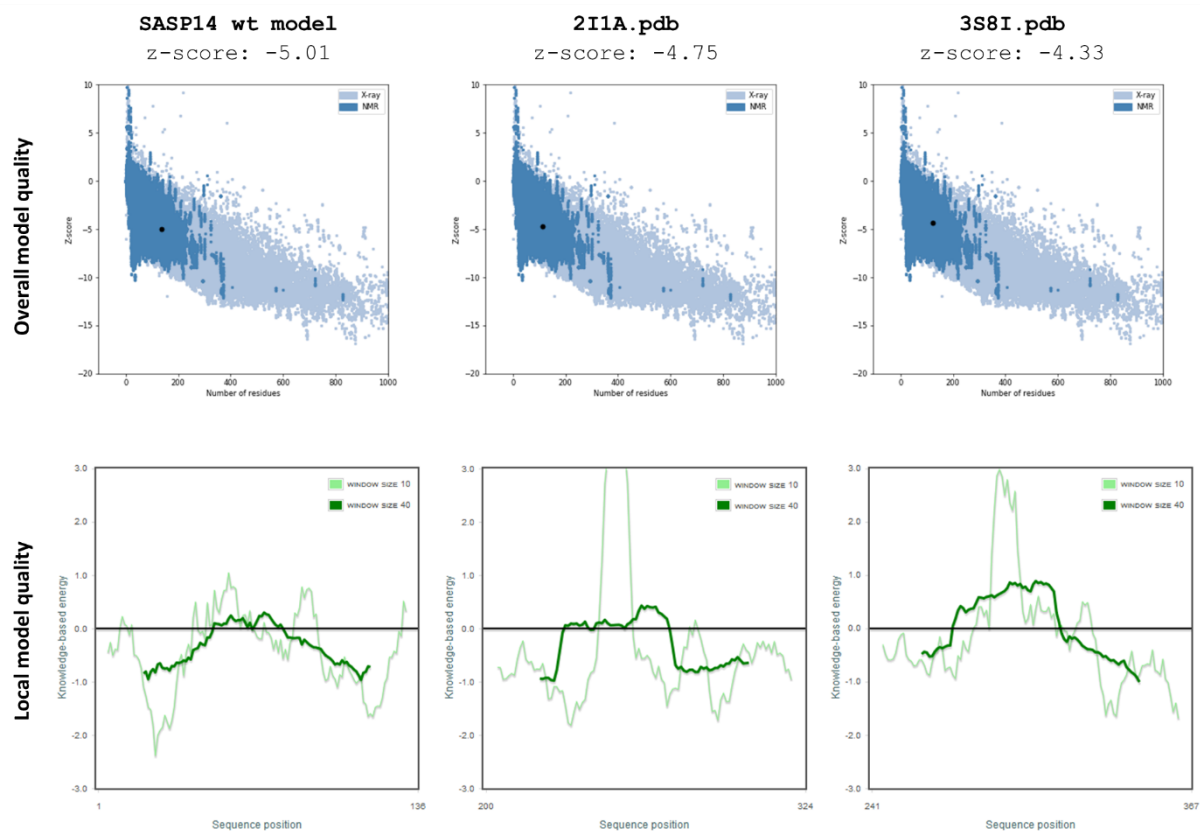

Supplement: s1 [file s1]
