# Supplementary material for: Biochemical Characterization of Human Retroviral-Like Aspartic Protease 1 (ASPRV1)
Source: MDPI journal article supplement (doi:10.3390/biom10071004), 2020-07-06
Supplement: s1 [file s1]

**Table S1.** Oligonucleotide primers used for cloning and mutagenesis. (a) The oligonucleotide primers used to amplify SASP37, SASP28, and SASP14 sequences from pCMV6-XL4-asprv1 vector. Codon encoding Ile2 residue is underlined in forward-BamH1-SASP14 primer (wild-type residue is Met2 according to SASP14 numbering). (b) Oligonucleotide primers used for mutagenesis are listed here and were deposited to the public oligonucleotide database of Laboratory of Retroviral Biochemistry: <http://lrb.med.unideb.hu/research/oligos>.

A)

| Name                    | Sequence                                                 |
|-------------------------|----------------------------------------------------------|
| forward-BamH1-SASP37    | 5'-G ATA GGA TCC GGG AGC CCA GGG GC-3'                   |
| forward-BamH1-SASP28    | 5'-G ATA GGA TCC GCC GGG AGC GGA GCC-3'                  |
| forward-BamH1-SASP14    | 5'-G ATA GGA TCC AGC <u>ATC</u> GGT AAG GGC-3'           |
| reverse-EcoR1-SASP37/28 | 5'-CT ATT GAA TTC TCA GTG GGA TAG CTC CTG CCG-3'         |
| reverse-EcoR1-SASP14    | 5'-CT ATT GAA TTC TCA CTC CAG GTC AAA CTC ATC TTC CAG-3' |

B)

| Name                                                   | Sequence                                                          |
|--------------------------------------------------------|-------------------------------------------------------------------|
| Processing site mutant: SASP28-A189K/N190I             |                                                                   |
| SASP28-A189K/N190I                                     | 5'-CTG CCC AAA GAG ATC GTC TTT AAG ATC AGC ATG GGT AAG GGC TAC-3' |
| Processing site mutant: SASP28-A167G/L168G/A189K/N190I |                                                                   |
| SASP28-A189K/N190I                                     | 5'-CTG CCC AAA GAG ATC GTC TTT AAG ATC AGC ATG GGT AAG GGC TAC-3' |
| SASP28-A167G/L168G                                     | 5'-G GG ACT GTG AAA GAG GGC GGC CTG AAG GCC TTT GGG-3'            |
