# Supplementary material for: Biochemical Characterization of Human Retroviral-Like Aspartic Protease 1 (ASPRV1)
Source: MDPI journal article supplement (doi:10.3390/biom10071004), 2020-07-06

**Figure S4.** Hydrophobicity and residue volume profiles of cleavage site sequences. (a) Hydrophobicity profiles were determined for natural cleavage sequences of ASPRV1 and HIV-1 proteases, based on hydropathy index values of residues. (b) Residue volumes were determined as it was described previously [24,25]. Average residue volumes are shown for ASPRV1 and HIV-1 protease cleavage site sequences by white and black columns, respectively. (c) List of cleavage site sequences used for the comparison of hydrophobicity profiles and residue volumes.

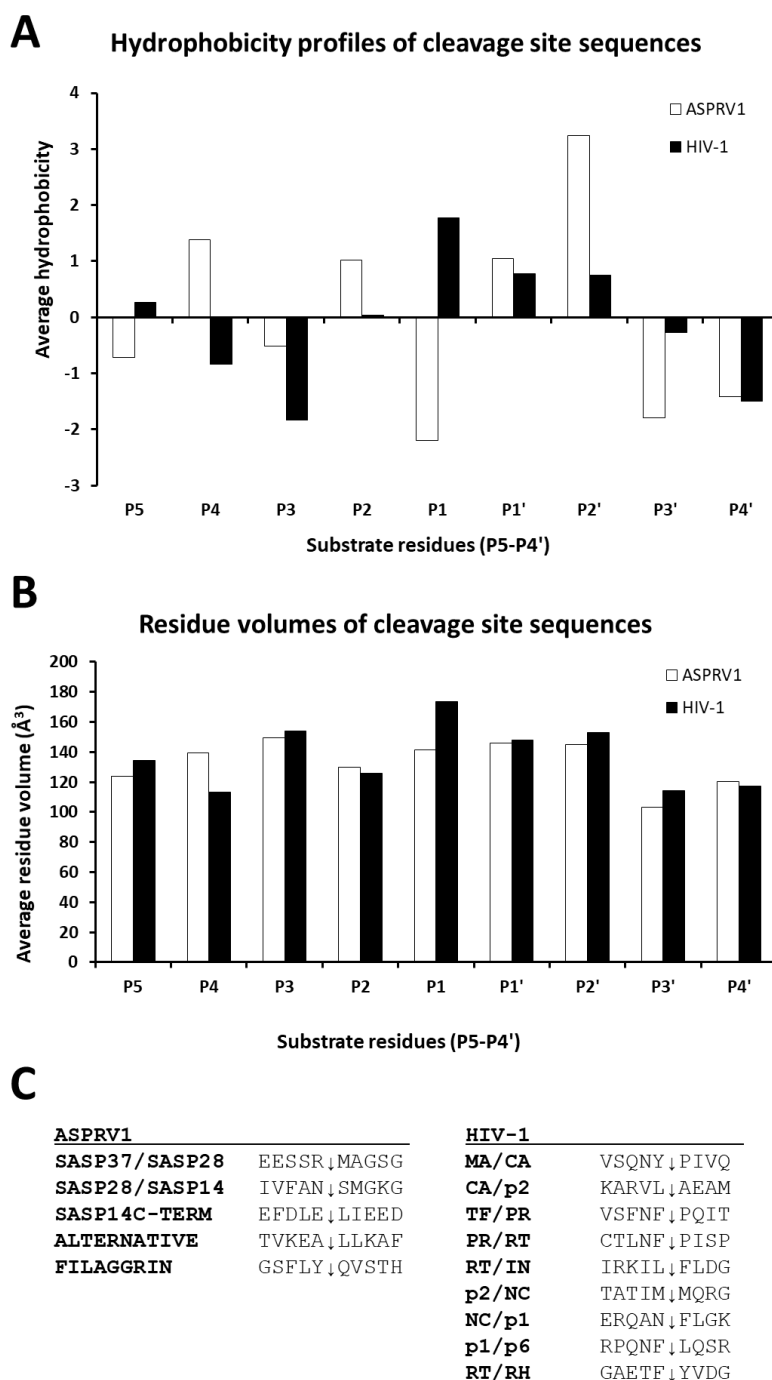

Supplement: s1 [file s1]
