# Supplementary material for: Biochemical Characterization of Human Retroviral-Like Aspartic Protease 1 (ASPRV1)
Source: MDPI journal article supplement (doi:10.3390/biom10071004), 2020-07-06

**Figure S5.** Putative hydrogen bonds between SASP14 and P3-Lys residue of the modified substrates. Figure shows proposed model of SASP14 complexed with P3-Lys modified version of VSQNY↓PIVQ oligopeptide. Hydrogen bonds are shown by dashed grey lines. Color code: yellow,  $\beta$ -strand; red,  $\alpha$ -helix; green, loop.

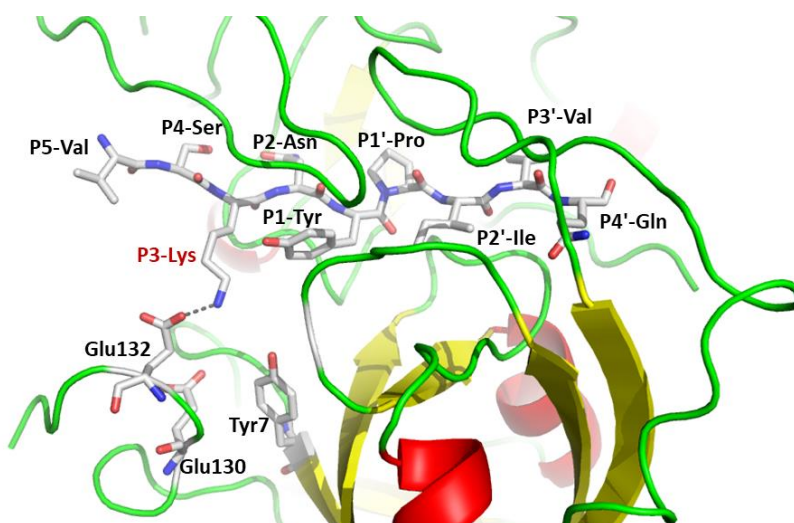

Supplement: s1 [file s1]
