# Supplementary material for: Biochemical Characterization of Human Retroviral-Like Aspartic Protease 1 (ASPRV1)
Source: MDPI journal article supplement (doi:10.3390/biom10071004), 2020-07-06

**Figure S2. Structures of Ddi1 and Ddi2 proteases as templates for modeling of SASP14.** (a) Template search by SWISS-MODEL resulted in Ddi1 and Ddi2 proteases as potential templates for modeling of SASP14, the obtained data are shown. (b) Structure alignment of Ddi1 and Ddi2 protease structures by mTm-Align web server, the PDB identifiers of templates are shown. Common core regions are shown by magenta color. RMSD values (Å) obtained from the comparison are shown below the aligned sequences. (c) Comparison of SASP14 homology model and structures of Ddi1 and Ddi2 proteases. Ddi proteases contain no closed conformational flaps.

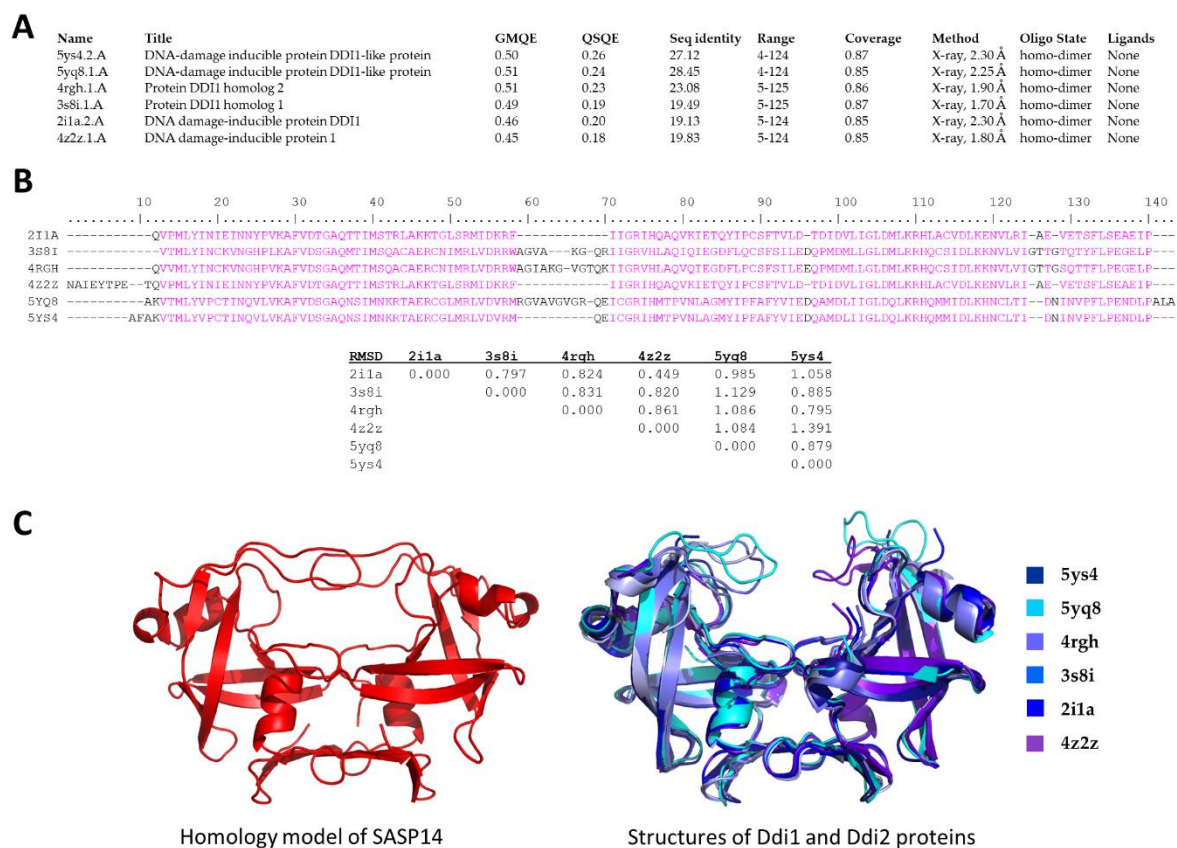

Supplement: s1 [file s1]
