# Supplementary material for: Biochemical Characterization of Human Retroviral-Like Aspartic Protease 1 (ASPRV1)
Source: Biomolecules. 2020 Jul 6;10(7):1004. doi: 10.3390/biom10071004 (PMC7408472; doi:10.3390/biom10071004)
Supplement: Supplementary file 1 [file biomolecules-10-01004-s001.zip]

Archive with 9 entries (9 files):
- Figure S7.pdf
- Figure_S4.pdf
- Table_S2.pdf
- Figure_S1.pdf
- Figure_S6.pdf
- Figure_S5.pdf
- Figure_S3.pdf
- Figure_S2.pdf
- Table_S1.pdf
